# Supplementary material
Source: Springer Nature journal article supplement (https://www.springermedizin.de/resource/supplementary/12974_2011_449_MOESM3_ESM.pdf/9601328)

A

GFAP

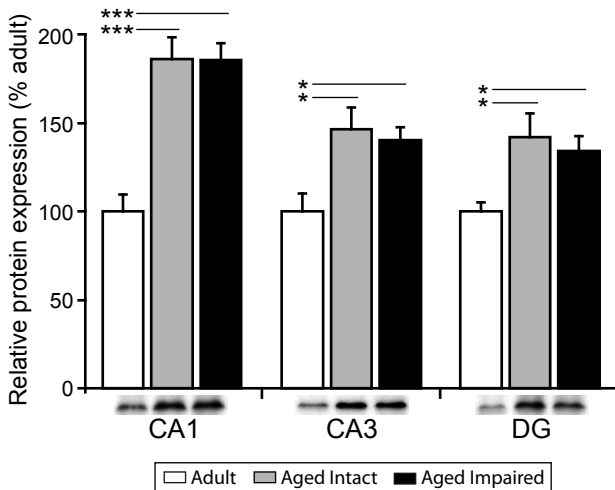

B

Iba1

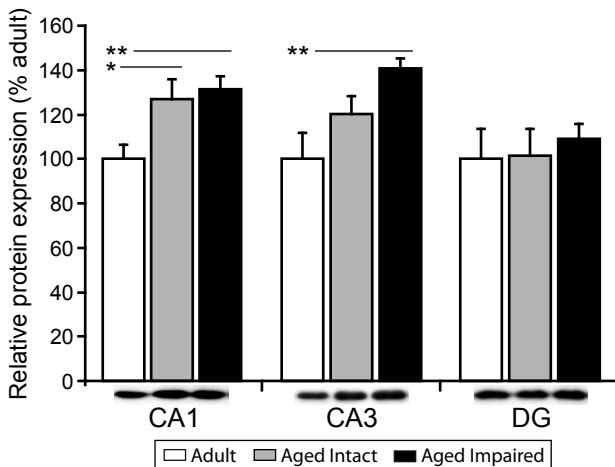

Supplement: MOESM3 [file 9601328]
